# Supplementary material
Source: PubMed Central journal article supplement (PMC6482375)
Supplement: NIHMS1015242-supplement-1.pdf [file NIHMS1015242-supplement-1.pdf]

Supplemental material:

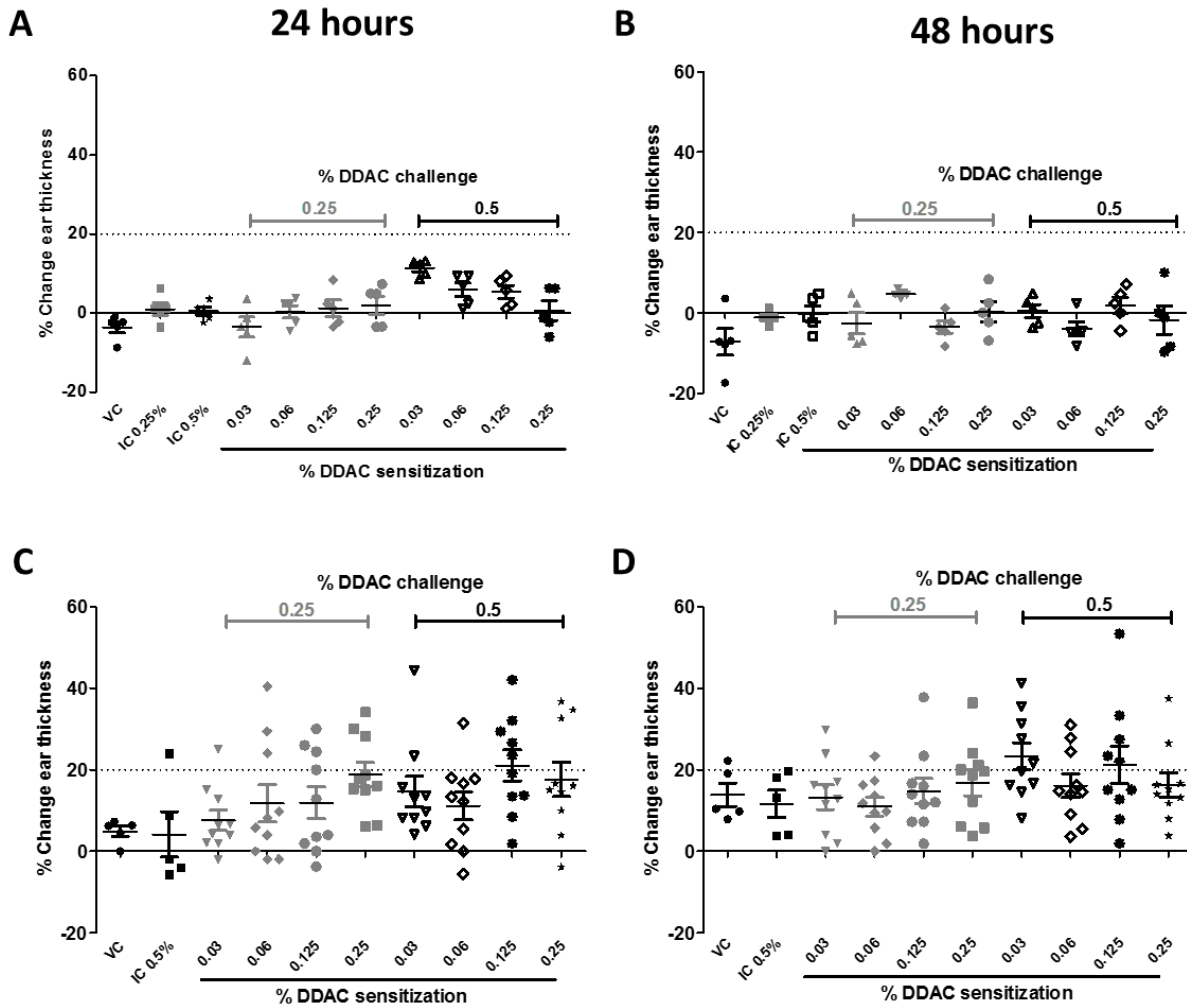

**Supplemental Figure 1. Mouse ear swelling test confirms that DDAC is a contact sensitizer**

**in mice.** Mice (5/group) were sensitized on the shaved dorsum with acetone, for the vehicle control (VC) and the irritation control (IC) or increasing concentrations of DDAC (0.03% - 0.25%), as indicated at the bottom of the x-axis. Following sensitization, mice were challenged with either acetone (VC), 0.25% DDAC (gray points) or 0.5% DDAC (black points) on the ear pinna. Each point represents the change in ear thickness from a pre-challenge reading measured at 24 hr (A) or 48 hr (B) post first challenge, and 24 hr (C) or 48 hr (D) post the second challenge. VC= vehicle

control, IC = 0.5% DDAC irritation control. Each point represents the % change in ear thickness of a single ear. A 20% increase threshold is considered positive as a contact sensitizer; for the MEST to be positive only one subject from each test group must exhibit >20% swelling.

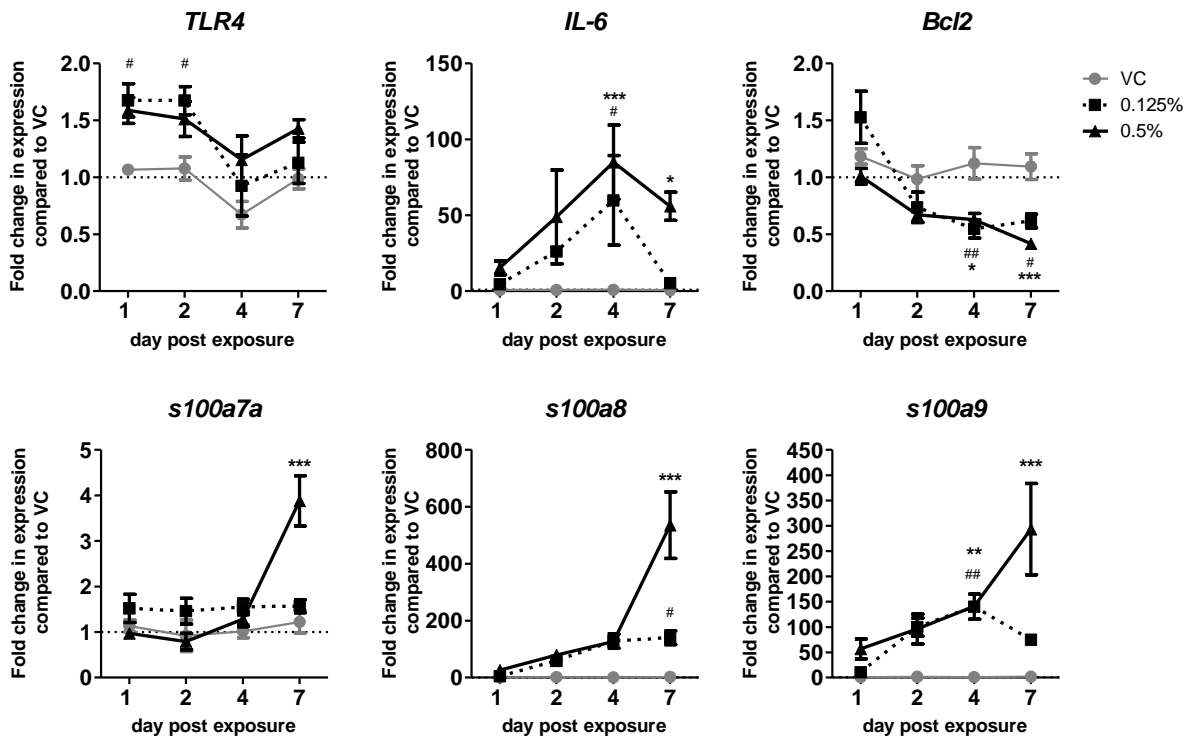

**Supplemental Figure 2. Gene expression in the skin following topical exposure to DDAC.**

Gene expression analysis was performed on ear tissue over time following exposure to DDAC for up to 7 days. Each point represents the level of the indicated gene’s mRNA expression relative to acetone (VC), and normalized to  $\beta$ -actin as an endogenous control. Each dot represents mean ( $\pm$  SEM) of 5 mice per group. Significance was determined using a two-way ANOVA and Bonferroni

post-tests to compare each treatment group to its respective acetone control. P values are represented by #s (0.125% DDAC) and \*s (0.5% DDAC) where #/\* =  $p < 0.05$ , ##/\*\* =  $p < 0.01$ , and ###/\*\*\* =  $p < 0.001$ .

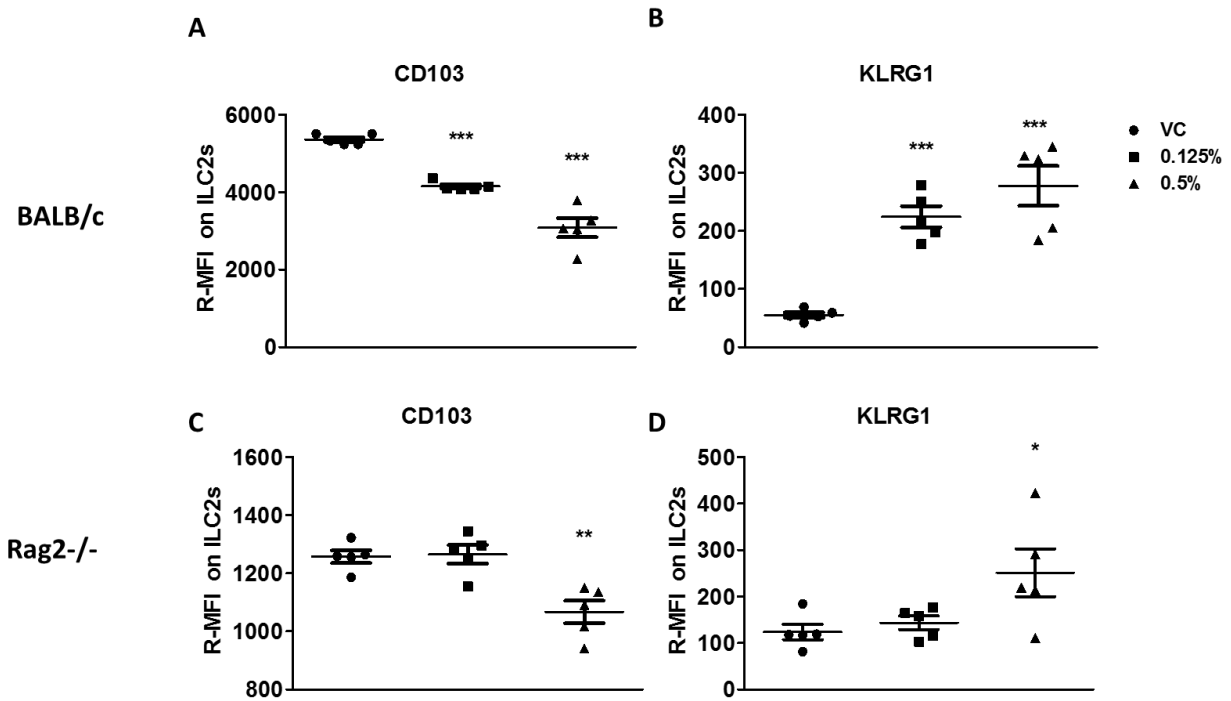

**Supplemental Figure 3. Additional phenotypic analysis of ILCs from BALB/c and Rag2<sup>-/-</sup> at 7 days post DDAC exposure.** ILC2s from BALB/c (A + B) and Rag2<sup>-/-</sup> mice (C + D) were assessed for expression of CD103 and KLRG1 as indicated. Analysis was performed on cells isolated from ear tissue at 7 days post DDAC exposure. ILC2s were identified as described in Figures 2 and 3. Median fluorescent intensity (relative to unstained controls) was determined for the expression of CD103 (A + C) and KLRG1 (B + D) at 7 dpe to DDAC. Statistical significance

was determined using an one-way ANOVA with a Dunnett's post-test. P values are represented as \*s where \* = p< 0.05, \*\* = p< 0.01, and \*\*\* = p <0.001; n= 5 mice/group.

**Supplemental Table 1. Cytokines expressed in ear lysate from BALB/c mice following 7 days of DDAC exposure:**

| Cytokine      | Th designation    | Vehicle control | DDAC(0.125%)   | DDAC (0.5%)       |
|---------------|-------------------|-----------------|----------------|-------------------|
| IL-4          | Th2               | 0.63 ± 0.04     | 1.02 ± 0.13    | 22.46 ± 16.01 **  |
| IL-5          | Th2               | 5.52 ± 0.91     | 5.89 ± 0.53    | 7.07 ± 1.18       |
| IL-13         | Th2               | 6.94 ± 0.57     | 5.49 ± 0.46    | 5.07 ± 0.53 *     |
| IFN- $\gamma$ | Th1               | 0.92 ± 0.16     | 0.90 ± 0.05    | 1.38 ± 0.29       |
| IL-12p70      | Th1               | 1.80 ± 0.24     | 2.51 ± 0.49    | 3.31 ± 0.75       |
| IL-18         | Th1               | 91.43 ± 3.26    | 94.63 ± 4.04   | 240.29 ± 93.20 ** |
| IL-17A        | Th17              | 4.98 ± 0.24     | 5.83 ± 0.58    | 16.13 ± 5.21 *    |
| IL-22         | Th17              | 1.38 ± 0.57     | 14.21 ± 5.37   | 68.65 ± 26.10 *   |
| IL-23         | Th17              | 222.12 ± 11.29  | 209.80 ± 12.89 | 208.01 ± 10.37    |
| GM-CSF        | Th1/Th17          | 0.09 ± 0.09     | 1.31 ± 0.36    | 4.90 ± 1.09 ***   |
| TNF- $\alpha$ | Th1/Th17          | 4.51 ± 0.42     | 5.96 ± 0.65    | 13.86 ± 3.07 **   |
| IL-27         | Th1/Treg          | 21.10 ± 2.26    | 22.46 ± 1.78   | 26.73 ± 1.44      |
| IL-2          | Th1/Th2/Treg      | 8.73 ± 0.60     | 7.47 ± 0.79    | 10.63 ± 2.65      |
| IL-1 $\beta$  | Th1/Th2/Th17      | 0.86 ± 0.10     | 0.90 ± 0.08    | 4.13 ± 1.72       |
| IL-6          | Th1/Th2/Th17      | 41.08 ± 2.46    | 38.51 ± 3.08   | 50.85 ± 10.40     |
| IL-9          | Th9/Th2/Th17      | 105.64 ± 3.35   | 108.15 ± 4.44  | 124.61 ± 8.26     |
| IL-10         | Th1/Th2/Th17/Treg | 24.13 ± 1.64    | 21.06 ± 1.88   | 22.97 ± 1.69      |

N= 4 mice per group, statistical significance was determined using a one-way ANOVA with a Dunnett's post-test where \* = p< 0.05, \*\* = p< 0.01, and \*\*\* = p <0.001.

**Supplemental Table 2. Cytokines expressed in ear lysate from Rag2<sup>-/-</sup> mice following 7 days of DDAC exposure:**

| Cytokine      | Th designation    | Vehicle control | DDAC (0.125%) | DDAC (0.5%)                |
|---------------|-------------------|-----------------|---------------|----------------------------|
| IL-4          | Th2               | n.d.            | 0.29 ± 0.19   | 29.34 ± 18.43 <sup>§</sup> |
| IL-5          | Th2               | 2.30 ± 0.38     | 2.97 ± 0.26   | 5.64 ± 0.94 **             |
| IL-13         | Th2               | 2.57 ± 0.29     | 3.17 ± 0.24   | 2.66 ± 0.17                |
| IFN- $\gamma$ | Th1               | 0.64 ± 0.05     | 0.73 ± 0.05   | 0.95 ± 0.05 **             |
| IL-12p70      | Th1               | 2.87 ± 0.81     | 2.20 ± 0.21   | 2.44 ± 0.42                |
| IL-18         | Th1               | 34.75 ± 4.09    | 39.71 ± 3.23  | 237.18 ± 87.67 *           |
| IL-17A        | Th17              | 1.94 ± 0.14     | 2.22 ± 0.15   | 2.71 ± 87.67 *             |
| IL-22         | Th17              | 1.95 ± 1.11     | 2.89 ± 1.19   | 57.57 ± 15.02 **           |
| IL-23         | Th17              | 37.72 ± 4.65    | 48.33 ± 7.38  | 37.60 ± 0.61               |
| GM-CSF        | Th1/Th17          | 0.15 ± 0.09     | 0.71 ± 0.20   | 4.48 ± 0.63 ***            |
| TNF- $\alpha$ | Th1/Th17          | 1.31 ± 0.68     | 2.52 ± 0.85   | 12.75 ± 1.59 ***           |
| IL-27         | Th1/Treg          | 10.62 ± 0.61    | 12.59 ± 1.85  | 15.47 ± 1.13 *             |
| IL-2          | Th1/Th2/Treg      | 2.89 ± 0.39     | 3.59 ± 0.58   | 3.80 ± 0.21                |
| IL-1 $\beta$  | Th1/Th2/Th17      | 0.01 ± 0.01     | 0.17 ± 0.07   | 6.32 ± 0.93 ***            |
| IL-6          | Th1/Th2/Th17      | 25.31 ± 2.73    | 29.75 ± 5.22  | 37.41 ± 1.50               |
| IL-9          | Th9/Th2/Th17      | 60.92 ± 4.09    | 62.45 ± 1.53  | 48.13 ± 1.40 *             |
| IL-10         | Th1/Th2/Th17/Treg | 17.07 ± 2.57    | 24.60 ± 1.70  | 26.13 ± 2.42 *             |

N= 4 mice per group, statistical significance was determined using a one-way ANOVA with a Dunnett's post-test where \* = p< 0.05, \*\* = p< 0.01, and \*\*\* = p <0.001.

n.d. = not detected

<sup>§</sup> cytokine was undetectable in control
